# Supplementary material for: New zinc diphosphonates with bright tunable luminescence and 12-member ring channels
Source: Royal Society of Chemistry journal article supplement (doi:10.1039/c1ce05759f), 2011-01-01
Supplement: c1ce05759f.pdf [file c1ce05759f.pdf]

## Supplementary information

### New zinc diphosphonates with bright tunable luminescence and 12-member ring channels

Ruibiao Fu\*, Shengmin Hu, Xintao Wu\*

*State Key Laboratory of Structural Chemistry, Fujian Institute of Research on the Structure of Matter, Chinese Academy of Science, Fuzhou, Fujian, 350002 China*

\* Corresponding author. E-mail: wxt@fjirsm.ac.cn

#### Materials and instrumentation

All chemicals were obtained from commercial sources without further purification. Elemental analyses were carried out with a Vario EL III element analyzer. Infrared spectra were obtained on a Nicolet Magna 750 FT-IR spectrometer. Photoluminescence properties were investigated in solid state at room temperature with F-7000 FL, FLS920 and LifeSpec-ps spectrophotometers. Thermogravimetric analysis (TGA) was performed on a Netzsch STA449C at a heating rate of 10 °C · min<sup>-1</sup> from room temperature to 1000 °C under an air gas flow. Powder XRD patterns were acquired on a DMAX-2500 diffractometer using CuK $\alpha$  radiation at ambient environment.

**Synthesis of (C<sub>6</sub>H<sub>10</sub>N<sub>2</sub>)<sub>0.5</sub>[Zn<sub>3</sub>(L)(HL)]·3H<sub>2</sub>O (1).** A mixture of H<sub>4</sub>L·H<sub>2</sub>O (0.0610 g, 0.202 mmol), Zn(CH<sub>3</sub>COO)<sub>2</sub>·2H<sub>2</sub>O (0.0405 g, 0.185 mmol), and 4-picolylamine (0.8 mL, 7.9 mmol) in 6.0 mL distilled water with the pH value adjusted to 3.74, was sealed into a Parr Teflon-lined autoclave (23 mL) and heated at 160 °C for 120 h. After slow cooling to room temperature, colorless crystals were obtained as a homogenous phase based on powder XRD patterns. Yield: 0.0425 g (80 %). Anal. Calc. for C<sub>17</sub>H<sub>26</sub>N<sub>3</sub>O<sub>17</sub>P<sub>4</sub>Zn<sub>3</sub>: C 23.19, H 2.98, N 4.77 %. Found: C 22.88, H 2.96, N 4.85 %. IR (KBr pellet, cm<sup>-1</sup>): 3434m( $\nu_{O-H}$ ), 3190m( $\nu_{O-H}$ ), 3105w, 2955w( $\nu_{C-H}$ ), 2929w, 2857w, 1614m, 1592w, 1490w, 1442m, 1384w, 1356w, 1317w, 1134s( $\nu_{P=O}$ ), 1117s( $\nu_{P-O}$ ), 1082s( $\nu_{P-O}$ ), 1057s( $\nu_{P-O}$ ), 1033s( $\nu_{P-O}$ ), 1005m( $\nu_{P-O}$ ), 986m( $\nu_{P-O}$ ), 864w, 814m, 704m, 677w, 660m, 626m, 610w, 567m, 529w.

**Synthesis of (H<sub>2</sub>G)<sub>0.5</sub>[Zn<sub>3</sub>(L)(HL)]·3H<sub>2</sub>O (G = 3-picolylamine (2), piperazine (3), 2-methylpiperazine (4), 1,2-ethanediamine (5), 1,3-propanediamine (6), 1,4-butane diamine (7), 1,2-propanediamine (8), 3-aminopropylmethylamine (9)) and (H<sub>4</sub>G)<sub>0.25</sub>[Zn<sub>3</sub>(L)(HL)]·3H<sub>2</sub>O (G = tri(2-aminoethyl)amine (10)).** Compounds 2-10 were synthesized by the similar procedure as 1 except for replacement of 4-picolylamine with 3-picolylamine, piperazine, 2-methylpiperazine, 1,2-ethanediamine, 1,3-propanediamine, 1,4-butanediamine, 1,2-propanediamine,

3-aminopropylmethylamine and tri(2-aminoethyl)amine, respectively. These patterns of powder XRD were in accord with that simulated from single-crystal X-ray data of **1**, which indicated homogeneous phase of respective product. Anal. Calc. for  $C_{16}H_{27}N_3O_{17}P_4Zn_3$  (**2**): C 23.19, H 2.98, N 4.77 %; Found: C 23.16, H 3.03, N 4.82 %. For  $C_{17}H_{26}N_3O_{17}P_4Zn_3$  (**3**): C 22.52, H 3.19, N 4.92 %; Found: C 22.12, H 3.06, N 4.92 %. For  $C_{16.5}H_{27}N_3O_{17}P_4Zn_3$  (**4**): C 23.06, H 3.17, N 4.89 %; Found: C 22.72, H 3.22, N 4.77 %. For  $C_{15}H_{26}N_3O_{17}P_4Zn_3$  (**5**): C 21.44, H 3.12, N 5.00 %; Found: C 20.85, H 3.01, N 4.69 %. For  $C_{15.5}H_{27}N_3O_{17}P_4Zn_3$  (**6**): C 21.97, H 3.21, N 4.96 %; Found: C 21.64, H 3.07, N 4.75 %. For  $C_{16}H_{28}N_3O_{17}P_4Zn_3$  (**7**): C 22.49, H 3.30, N 4.92 %; Found: C 22.56, H 3.21, N 5.02 %. For  $C_{15.5}H_{27}N_3O_{17}P_4Zn_3$  (**8**): C 21.97, H 3.21, N 4.96 %; Found: C 21.25, H 2.86, N 4.55 %. For  $C_{16}H_{28}N_3O_{17}P_4Zn_3$  (**9**): C 22.49, H 3.30, N 4.92 %; Found: C 22.12, H 3.13, N 4.63 %. For  $C_{15.5}H_{26.5}N_3O_{17}P_4Zn_3$  (**10**): C 21.98, H 3.15, N 4.96 %; Found: C 22.03, H 3.12, N 5.19 %.

### X-Ray crystallography

X-ray data for **1** were collected at 293(2) K on a Rigaku Mercury CCD/AFC diffractometer using graphite-monochromated Mo  $K\alpha$  radiation ( $\lambda(\text{Mo-}K\alpha) = 0.71073 \text{ \AA}$ ). Data of **1** were reduced with CrystalClear v1.3. The structure was solved by direct methods and refined by full-matrix least-squares techniques on  $F^2$  using SHELXTL-97.<sup>1</sup> All non-hydrogen atoms were treated anisotropically. The protonated 4-picolylamine lies disordered about inversion centres. Hydrogen atoms of 1-hydroxyl-2-(3-pyridyl)ethylidene-1,1-diphosphonate group were generated geometrically. While no attempts were performed to locate other hydrogen atoms. Crystallographic data for **1** are summarized in Table S1. Selected bond lengths for **1** are listed in Table S2. CCDC-817237 (**1**) and 838869 (**4**).

**Table S1.** Crystallographic data for **1**

| Compound                                                                                                                              | <b>1</b>                                                                                      |
|---------------------------------------------------------------------------------------------------------------------------------------|-----------------------------------------------------------------------------------------------|
| Formula                                                                                                                               | C <sub>17</sub> H <sub>26</sub> N <sub>3</sub> O <sub>17</sub> P <sub>4</sub> Zn <sub>3</sub> |
| FW                                                                                                                                    | 864.40                                                                                        |
| Space group                                                                                                                           | P2(1)/c                                                                                       |
| a (Å)                                                                                                                                 | 9.655(3)                                                                                      |
| b (Å)                                                                                                                                 | 9.344(3)                                                                                      |
| c (Å)                                                                                                                                 | 30.965(9)                                                                                     |
| α (deg)                                                                                                                               | 90                                                                                            |
| β (deg)                                                                                                                               | 93.859(5)                                                                                     |
| γ (deg)                                                                                                                               | 90                                                                                            |
| V (Å <sup>3</sup> )                                                                                                                   | 2787.4(13)                                                                                    |
| Z                                                                                                                                     | 4                                                                                             |
| T(K)                                                                                                                                  | 293(2)                                                                                        |
| Measured/unique/ observed reflections                                                                                                 | 21087 / 6381 / 5711                                                                           |
| D <sub>calcd</sub> (g cm <sup>3</sup> )                                                                                               | 2.060                                                                                         |
| μ (mm <sup>-1</sup> )                                                                                                                 | 2.876                                                                                         |
| GOF on F <sup>2</sup>                                                                                                                 | 1.089                                                                                         |
| R <sub>int</sub>                                                                                                                      | 0.0383                                                                                        |
| R1 <sup>a</sup> [I>2σ(I)]                                                                                                             | 0.0545                                                                                        |
| wR2 <sup>b</sup> [all data]                                                                                                           | 0.1427                                                                                        |
| <sup>a</sup> R1 = $\sum( F_o  -  F_c ) / \sum  F_o $ . <sup>b</sup> wR2 = $\{\sum w [(F_o^2 - F_c^2)] / \sum w [(F_o^2)^2]\}^{0.5}$ . |                                                                                               |

**Table S2.** Selected bond lengths (Å) and angles (°) for **1**

|                                                                                                                       |            |                                             |            |
|-----------------------------------------------------------------------------------------------------------------------|------------|---------------------------------------------|------------|
| Zn(1)-O(1)                                                                                                            | 1.944(4)   | Zn(2)-O(10) <sup>a</sup>                    | 1.929(3)   |
| Zn(1)-O(4)                                                                                                            | 1.926(4)   | Zn(2)-O(13)                                 | 1.949(4)   |
| Zn(1)-O(8)                                                                                                            | 1.978(3)   | Zn(3)-O(2)                                  | 1.935(3)   |
| Zn(1)-O(12)                                                                                                           | 1.937 (4)  | Zn(3)-O(3) <sup>c</sup>                     | 2.000(3)   |
| Zn(2)-N(2) <sup>b</sup>                                                                                               | 2.017 (4)  | Zn(3)-O(5) <sup>c</sup>                     | 1.923(3)   |
| Zn(2)-O(9)                                                                                                            | 1.995(3)   | Zn(3)-O(11) <sup>d</sup>                    | 1.950(3)   |
| O(1)-Zn(1)-O(4)                                                                                                       | 103.19(15) | O(9)-Zn(2)-O(10) <sup>a</sup>               | 109.52(14) |
| O(1)-Zn(1)-O(8)                                                                                                       | 101.96(15) | O(9)-Zn(2)-O(13)                            | 99.40(14)  |
| O(1)-Zn(1)-O(12)                                                                                                      | 118.53(16) | O(10) <sup>a</sup> -Zn(2)-O(13)             | 109.09(16) |
| O(4)-Zn(1)-O(8)                                                                                                       | 108.71(15) | O(2)-Zn(3)-O(3) <sup>c</sup>                | 110.54(14) |
| O(4)-Zn(1)-O(12)                                                                                                      | 121.40(17) | O(2)-Zn(3)-O(5) <sup>c</sup>                | 109.00(15) |
| O(8)-Zn(1)-O(12)                                                                                                      | 101.11(14) | O(2)-Zn(3)-O(11) <sup>d</sup>               | 114.12(15) |
| N(2) <sup>b</sup> -Zn(2)-O(9)                                                                                         | 106.69(16) | O(3) <sup>c</sup> -Zn(3)-O(5) <sup>c</sup>  | 105.48(14) |
| N(2) <sup>b</sup> -Zn(2)-O(10) <sup>a</sup>                                                                           | 118.11(16) | O(3) <sup>c</sup> -Zn(3)-O(11) <sup>d</sup> | 105.57(14) |
| N(2) <sup>b</sup> -Zn(2)-O(13)                                                                                        | 112.35(17) | O(5) <sup>c</sup> -Zn(3)-O(11) <sup>d</sup> | 111.75(15) |
| Symmetry codes: a - x + 1, - y + 1, - z; b x + 1, y, z; c - x + 1, y + 1/2, - z + 1/2; d - x + 1, y - 1/2, - z + 1/2. |            |                                             |            |

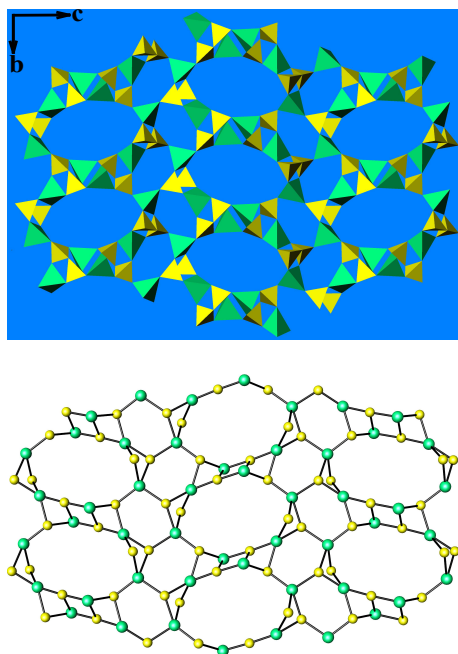

**Fig. S1** Polyhedral (top) and Ball-stick (bottom) view of the 2D layer in **1**.

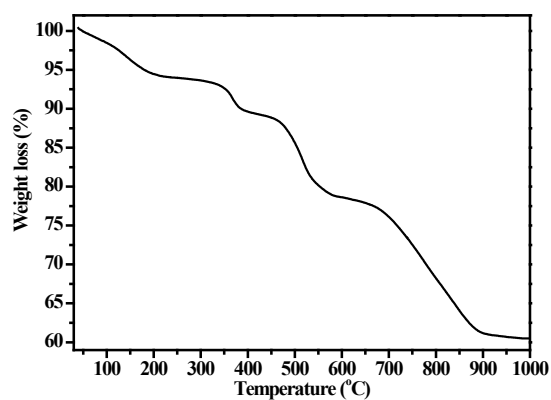

**Fig. S2** TGA curve of **1**.

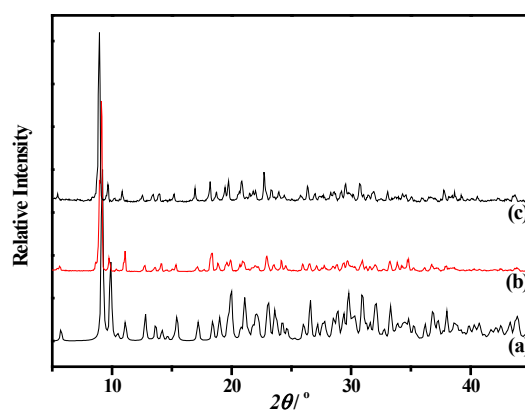

**Fig. S3** XRD patterns of **1** (a) simulated from X-ray single crystal data, (b) polycrystalline as newly synthesized, and (c) polycrystalline annealed at 250 °C.

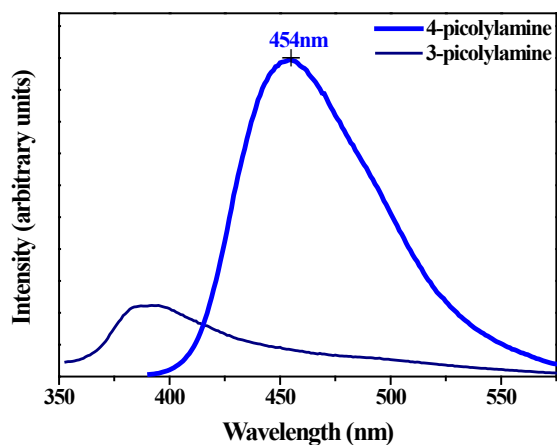

Fig. S4 Emission spectra of 4-picolylamine and 3-picolylamine.

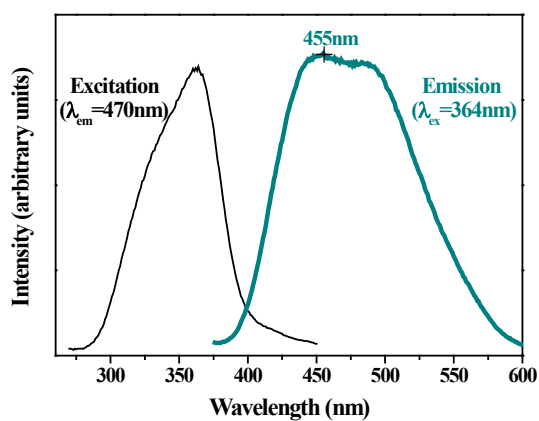

Fig. S5 Emission and excitation spectra of 4-picolylamine hydrochloride solution.

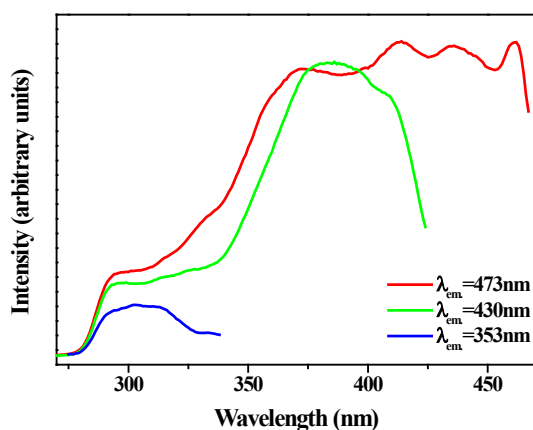

Fig. S6 Relative intensity of excitation spectra for **1** with emission fixed at 473, 430 and 353 nm, respectively.

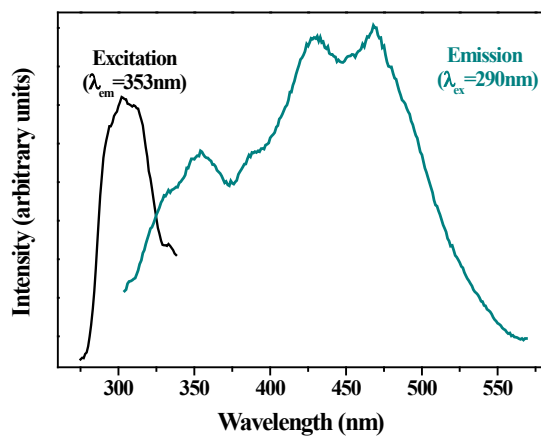

Fig. S7 Emission and excitation spectra of as-prepared **1**.

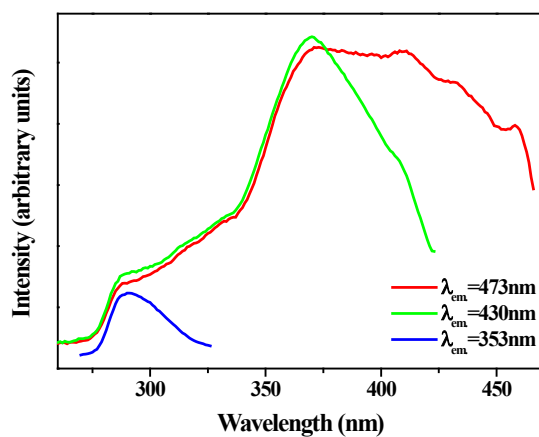

Fig. S8 Relative intensity of fluorescent excitation spectra for **1-250** with emission fixed at 473, 430 and 353 nm, respectively.

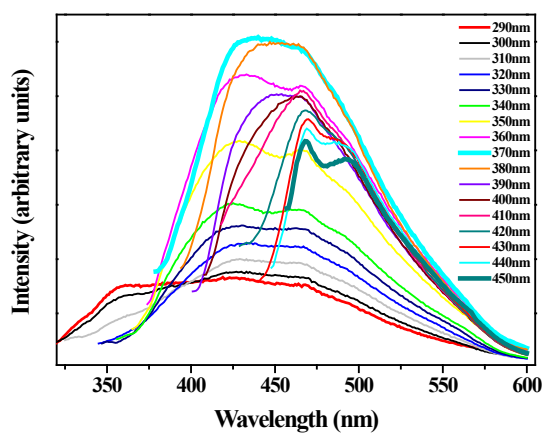

Fig. S9 Relative intensities of emission for **1-250** upon different wavelengths of excited light.

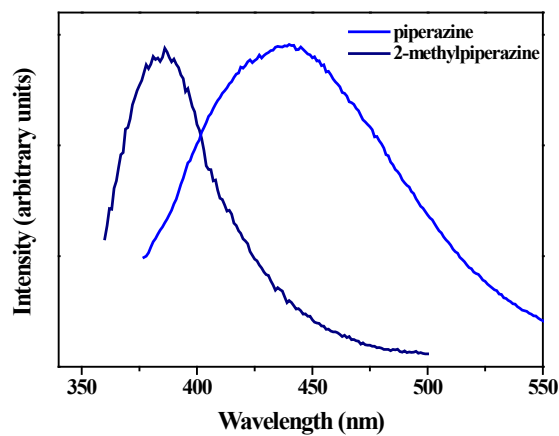

**Fig. S10** Emission spectra of piperazine and 2-methylpiperazine.

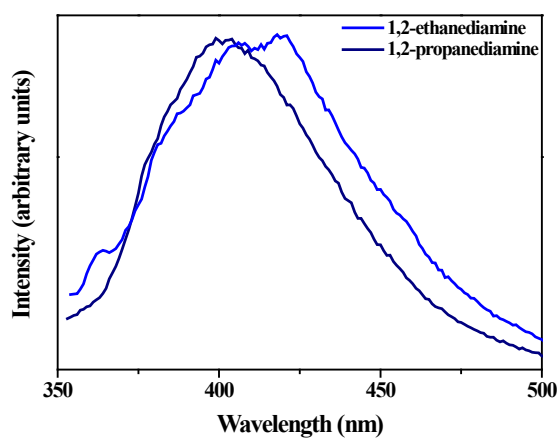

**Fig. S11** Emission spectra of 1,2-ethanediamine and 1,2-propanediamine.

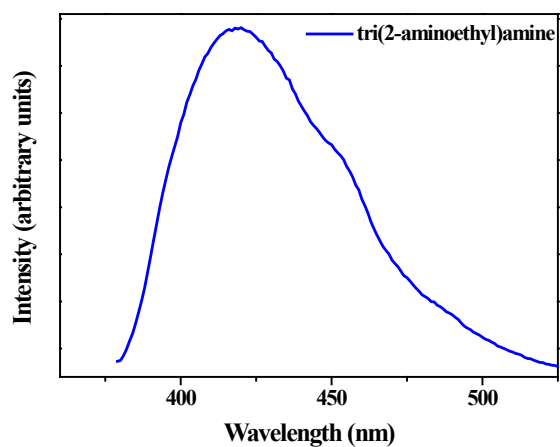

**Fig. S12** Emission spectrum of tri(2-aminoethyl)amine.

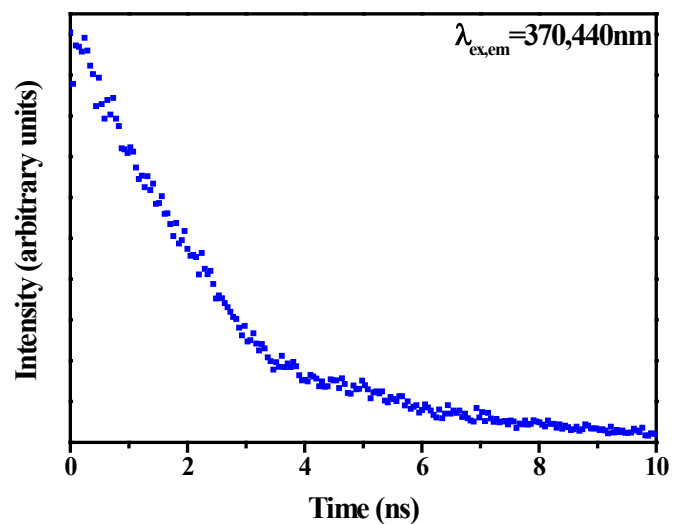

**Fig. S13** Room-temperature solid-state fluorescent intensity as a function of time for solid **1-250**.

#### References

- (1) G. M. Sheldrick, SHELXT 97, Program for Crystal Structure Refinement, University of Göttingen, Germany, 1997.
